# Supplementary material for: Hydrochloric acid-mediated mechanical synthesis of red-emitting all-inorganic zinc halides
Source: Royal Society of Chemistry journal article supplement (doi:10.1039/d4ce01243g), 2025-01-01
Supplement: d4ce01243g1.pdf [file d4ce01243g1.pdf]

## Supporting Information

### Hydrochloric Acid-Mediated Mechanical Synthesis of Red-Emitting All-Inorganic Zinc

#### Halides

Siyu Li,<sup>a</sup> Jiali Yao,<sup>a</sup> Dayang Wang,<sup>a</sup> Keke Huang,<sup>a</sup> Wensheng Yang,<sup>ab</sup> and Renguo Xie<sup>\*a</sup>

<sup>a</sup> State Key Laboratory of Inorganic Synthesis and Preparative Chemistry, College of Chemistry Jilin University, Changchun 130012, China.

<sup>b</sup> Engineering Center for Nanomaterials, Henan University, Kaifeng, 475004, China

\*E-mail: [renguoxie@jlu.edu.cn](mailto:renguoxie@jlu.edu.cn)

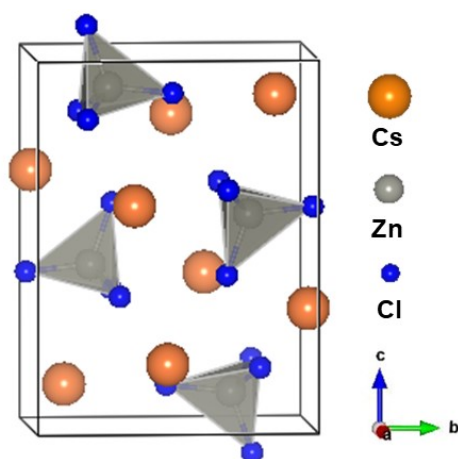

Figure S1. Single crystal structures of Cs<sub>2</sub>ZnCl<sub>4</sub>.

Table S1. Fitting parameters for the PL decay lifetime of hydrochloric acid-treated Cs<sub>2</sub>ZnCl<sub>4</sub>.

| Parameter      | Value        | Std. Dev.     | Rel%  |
|----------------|--------------|---------------|-------|
| $\tau_1$       | 4.203E-006 s | 1.0204E-007 s |       |
| $\tau_2$       | 1.171E-005 s | 1.4318E-007 s |       |
| B <sub>1</sub> | 7272.120     | 121.1099      | 43.79 |
| B <sub>2</sub> | 3351.017     | 127.7683      | 56.21 |
| A              | 0.417        |               |       |
| $\chi^2$       | 0.511        |               |       |

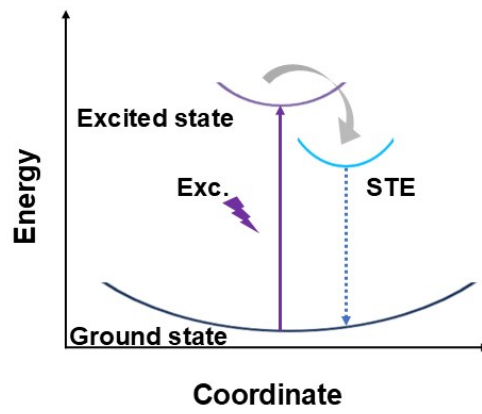

Figure S2. Possible luminescence mechanism of  $\text{Cs}_2\text{ZnCl}_4$ .

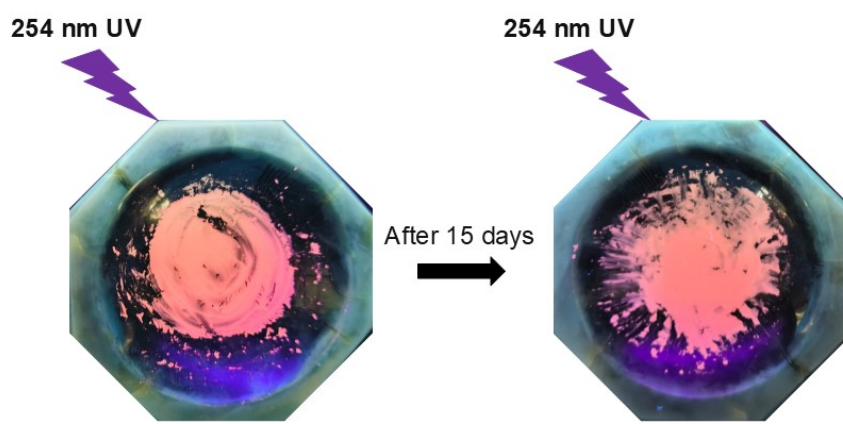

Figure S3. Photographs of luminescence of acid-treated  $\text{Cs}_2\text{ZnCl}_4$  under 254 nm UV light before and after 15 days of placement.
